# Supplementary material
Source: PubMed Central journal article supplement (PMC6535533)
Supplement: AAC.02618-18-s0001.pdf [file AAC.02618-18-s0001.pdf]

**Supplemental Table 1** Antimicrobial activity of carbapenem agents tested against *E. coli*, including challenge organisms, stratified by molecular characteristics

| Organism (no. of isolates) | No. and cumulative % of isolates inhibited at MIC (mg/L) of: |              |              |              |              |              |              |             |             |             |              | MIC <sub>50</sub> | MIC <sub>90</sub> |        |
|----------------------------|--------------------------------------------------------------|--------------|--------------|--------------|--------------|--------------|--------------|-------------|-------------|-------------|--------------|-------------------|-------------------|--------|
|                            | Antimicrobial agent                                          | ≤0.015       | 0.03         | 0.06         | 0.12         | 0.25         | 0.5          | 1           | 2           | 4           | 8            |                   |                   | >8     |
| Wild type (90)             |                                                              |              |              |              |              |              |              |             |             |             |              |                   |                   |        |
| Tebipenem                  | 70<br>(77.8)                                                 | 18<br>(97.8) | 1<br>(98.9)  | 1<br>(100.0) |              |              |              |             |             |             |              |                   | ≤0.015            | 0.03   |
| Meropenem                  | 82<br>(91.1)                                                 | 7<br>(98.9)  | 1<br>(100.0) |              |              |              |              |             |             |             |              |                   | ≤0.015            | ≤0.015 |
| Doripenem <sup>a</sup>     |                                                              |              | 88<br>(97.8) | 2<br>(100.0) |              |              |              |             |             |             |              |                   | ≤0.06             | ≤0.06  |
| Imipenem <sup>a</sup>      |                                                              |              | 18<br>(20.0) | 64<br>(91.1) | 6<br>(97.8)  | 2<br>(100.0) |              |             |             |             |              |                   | 0.12              | 0.12   |
| Ertapenem                  | 84<br>(93.3)                                                 | 2<br>(95.6)  | 1<br>(96.7)  | 3<br>(100.0) |              |              |              |             |             |             |              |                   | ≤0.015            | ≤0.015 |
| pAmpC and/or ESBL (47)     |                                                              |              |              |              |              |              |              |             |             |             |              |                   |                   |        |
| Tebipenem                  | 7<br>(14.9)                                                  | 29<br>(76.6) | 8<br>(93.6)  | 3<br>(100.0) |              |              |              |             |             |             |              |                   | 0.03              | 0.06   |
| Meropenem                  | 7<br>(14.9)                                                  | 31<br>(80.9) | 7<br>(95.7)  | 2<br>(100.0) |              |              |              |             |             |             |              |                   | 0.03              | 0.06   |
| Doripenem <sup>a</sup>     |                                                              |              | 23<br>(48.9) | 22<br>(95.7) | 2<br>(100.0) |              |              |             |             |             |              |                   | 0.12              | 0.12   |
| Imipenem <sup>a</sup>      |                                                              |              | 2<br>(4.3)   | 35<br>(78.7) | 4<br>(87.2)  | 6<br>(100.0) |              |             |             |             |              |                   | 0.12              | 0.5    |
| Ertapenem                  | 9<br>(19.1)                                                  | 18<br>(57.4) | 5<br>(68.1)  | 6<br>(80.9)  | 2<br>(85.1)  | 6<br>(97.9)  | 1<br>(100.0) |             |             |             |              |                   | 0.03              | 0.5    |
| Carbapenemase (10)         |                                                              |              |              |              |              |              |              |             |             |             |              |                   |                   |        |
| Tebipenem                  |                                                              |              |              |              |              |              | 1<br>(10.0)  | 0<br>(10.0) | 3<br>(40.0) | 3<br>(70.0) | 3<br>(100.0) |                   | 8                 | >8     |
| Meropenem                  |                                                              |              |              |              |              |              | 1<br>(10.0)  | 0<br>(10.0) | 3<br>(40.0) | 3<br>(70.0) | 3<br>(100.0) |                   | 8                 | >8     |
| Doripenem <sup>a</sup>     |                                                              |              |              |              |              |              | 2<br>(20.0)  | 3<br>(50.0) | 2<br>(70.0) | 1<br>(80.0) | 2<br>(100.0) |                   | 2                 | >8     |
| Imipenem <sup>a</sup>      |                                                              |              |              |              |              |              | 1<br>(10.0)  | 1<br>(20.0) | 5<br>(70.0) | 1<br>(80.0) | 2<br>(100.0) |                   | 4                 | >8     |
| Ertapenem                  |                                                              |              |              |              |              |              |              |             | 2<br>(20.0) | 2<br>(40.0) | 6<br>(100.0) |                   | >8                | >8     |

Shading represents susceptible MIC values per CLSI 2018

Abbreviations: pAmpC, plasmid AmpC; ESBL, extended-spectrum β-lactamase.

<sup>a</sup> The lowest concentration tested for doripenem and imipenem was 0.06 mg/L.

**Supplemental Table 2** Antimicrobial activity of tested agents against *K. pneumoniae*, including challenge organisms, stratified by genotype

| Organism (no. of isolates) | No. and cumulative % of isolates inhibited at MIC (mg/L) of: |               |               |               |              |             |             |              |              |              |               | MIC <sub>50</sub> | MIC <sub>90</sub> |       |
|----------------------------|--------------------------------------------------------------|---------------|---------------|---------------|--------------|-------------|-------------|--------------|--------------|--------------|---------------|-------------------|-------------------|-------|
|                            | Antimicrobial agent                                          | ≤0.015        | 0.03          | 0.06          | 0.12         | 0.25        | 0.5         | 1            | 2            | 4            | 8             |                   |                   | >8    |
| Wild type (169)            |                                                              |               |               |               |              |             |             |              |              |              |               |                   |                   |       |
| Tebipenem                  | 17<br>(10.1)                                                 | 132<br>(88.2) | 17<br>(98.2)  | 1<br>(98.8)   | 2<br>(100.0) |             |             |              |              |              |               |                   | 0.03              | 0.06  |
| Meropenem                  | 47<br>(27.8)                                                 | 119<br>(98.2) | 3<br>(100.0)  |               |              |             |             |              |              |              |               |                   | 0.03              | 0.03  |
| Doripenem <sup>a</sup>     |                                                              |               | 161<br>(95.3) | 7<br>(99.4)   | 1<br>(100.0) |             |             |              |              |              |               |                   | ≤0.06             | ≤0.06 |
| Imipenem <sup>a</sup>      |                                                              |               | 13<br>(7.7)   | 114<br>(75.1) | 33<br>(94.7) | 7<br>(98.8) | 1<br>(99.4) | 1<br>(100.0) |              |              |               |                   | 0.12              | 0.25  |
| Ertapenem                  | 150<br>(88.8)                                                | 9<br>(94.1)   | 6<br>(97.6)   | 2<br>(98.8)   | 1<br>(99.4)  | 0<br>(99.4) | 0<br>(99.4) | 1<br>(100.0) |              |              |               |                   | ≤0.015            | 0.03  |
| pAmpC and/or ESBL (39)     |                                                              |               |               |               |              |             |             |              |              |              |               |                   |                   |       |
| Tebipenem                  |                                                              | 24<br>(61.5)  | 6<br>(76.9)   | 3<br>(84.6)   | 3<br>(92.3)  | 0<br>(92.3) | 0<br>(92.3) | 1<br>(94.9)  | 1<br>(97.4)  | 1<br>(100.0) |               |                   | 0.03              | 0.25  |
| Meropenem                  | 2<br>(5.1)                                                   | 22<br>(61.5)  | 9<br>(84.6)   | 1<br>(87.2)   | 2<br>(92.3)  | 0<br>(92.3) | 0<br>(92.3) | 1<br>(94.9)  | 2<br>(100.0) |              |               |                   | 0.03              | 0.25  |
| Doripenem <sup>a</sup>     |                                                              |               | 28<br>(71.8)  | 5<br>(84.6)   | 3<br>(92.3)  | 0<br>(92.3) | 0<br>(92.3) | 1<br>(94.9)  | 1<br>(97.4)  | 1<br>(100.0) |               |                   | ≤0.06             | 0.25  |
| Imipenem <sup>a</sup>      |                                                              |               | 1<br>(2.6)    | 25<br>(66.7)  | 6<br>(82.1)  | 1<br>(84.6) | 5<br>(97.4) | 0<br>(97.4)  | 0<br>(97.4)  | 1<br>(100.0) |               |                   | 0.12              | 1     |
| Ertapenem                  | 4<br>(10.3)                                                  | 6<br>(25.6)   | 8<br>(46.2)   | 8<br>(66.7)   | 5<br>(79.5)  | 0<br>(79.5) | 3<br>(87.2) | 1<br>(89.7)  | 1<br>(92.3)  | 0<br>(92.3)  | 3<br>(100.0)  |                   | 0.12              | 4     |
| Carbapenemase (38)         |                                                              |               |               |               |              |             |             |              |              |              |               |                   |                   |       |
| Tebipenem                  |                                                              |               |               |               |              |             | 1<br>(2.6)  | 1<br>(5.3)   | 5<br>(18.4)  | 3<br>(26.3)  | 28<br>(100.0) |                   | >8                | >8    |
| Meropenem                  |                                                              |               |               |               |              |             |             | 3<br>(7.9)   | 5<br>(21.1)  | 3<br>(28.9)  | 27<br>(100.0) |                   | >8                | >8    |
| Doripenem <sup>a</sup>     |                                                              |               |               |               |              |             | 1<br>(2.6)  | 3<br>(10.5)  | 8<br>(31.6)  | 9<br>(55.3)  | 17<br>(100.0) |                   | 8                 | >8    |
| Imipenem <sup>a</sup>      |                                                              |               |               |               |              |             |             | 2<br>(5.3)   | 10<br>(31.6) | 12<br>(63.2) | 14<br>(100.0) |                   | 8                 | >8    |
| Ertapenem                  |                                                              |               |               |               |              |             |             | 1<br>(2.6)   | 1<br>(5.3)   | 7<br>(23.7)  | 29<br>(100.0) |                   | >8                | >8    |

Shading represents susceptible MIC values per CLSI 2018

Abbreviations: pAmpC, plasmid AmpC; ESBL, extended-spectrum β-lactamase.

<sup>a</sup> The lowest concentration tested for doripenem and imipenem was 0.06 mg/L.

**Supplemental Table 3** Antimicrobial activity of tested agents against *P. mirabilis*, including challenge organisms, stratified by genotype

| Organism (no. of isolates) | No. and cumulative % of isolates inhibited at MIC (mg/L) of: |              |              |              |              |              |              |              |              |              |              | MIC <sub>50</sub> | MIC <sub>90</sub> |        |
|----------------------------|--------------------------------------------------------------|--------------|--------------|--------------|--------------|--------------|--------------|--------------|--------------|--------------|--------------|-------------------|-------------------|--------|
|                            | Antimicrobial agent                                          | ≤0.015       | 0.03         | 0.06         | 0.12         | 0.25         | 0.5          | 1            | 2            | 4            | 8            |                   |                   | >8     |
| Wild type (102)            |                                                              |              |              |              |              |              |              |              |              |              |              |                   |                   |        |
| Tebipenem                  |                                                              | 15<br>(14.7) | 48<br>(61.8) | 34<br>(95.1) | 4<br>(99.0)  | 1<br>(100.0) |              |              |              |              |              |                   | 0.06              | 0.12   |
| Meropenem                  | 1<br>(1.0)                                                   | 17<br>(17.6) | 62<br>(78.4) | 17<br>(95.1) | 5<br>(100.0) |              |              |              |              |              |              |                   | 0.06              | 0.12   |
| Doripenem <sup>a</sup>     |                                                              |              | 3<br>(2.9)   | 15<br>(17.6) | 43<br>(59.8) | 30<br>(89.2) | 8<br>(97.1)  | 3<br>(100.0) |              |              |              |                   | 0.25              | 1      |
| Imipenem <sup>a</sup>      |                                                              |              | 1<br>(1.0)   | 6<br>(6.9)   | 14<br>(20.6) | 17<br>(37.3) | 51<br>(87.3) | 11<br>(98.0) | 2<br>(100.0) |              |              |                   | 1                 | 2      |
| Ertapenem                  | 99<br>(97.1)                                                 | 1<br>(98.0)  | 2<br>(100.0) |              |              |              |              |              |              |              |              |                   | ≤0.015            | ≤0.015 |
| pAmpC and/or ESBL (32)     |                                                              |              |              |              |              |              |              |              |              |              |              |                   |                   |        |
| Tebipenem                  |                                                              | 1<br>(3.1)   | 9<br>(31.3)  | 9<br>(59.4)  | 6<br>(78.1)  | 6<br>(96.9)  | 0<br>(96.9)  | 0<br>(96.9)  | 1<br>(100.0) |              |              |                   | 0.12              | 0.5    |
| Meropenem                  |                                                              | 1<br>(3.1)   | 10<br>(34.4) | 8<br>(59.4)  | 6<br>(78.1)  | 6<br>(96.9)  | 0<br>(96.9)  | 0<br>(96.9)  | 1<br>(100.0) |              |              |                   | 0.12              | 0.5    |
| Doripenem <sup>a</sup>     |                                                              |              | 5<br>(15.6)  | 7<br>(37.5)  | 7<br>(59.4)  | 7<br>(81.3)  | 5<br>(96.9)  | 1<br>(100.0) |              |              |              |                   | 0.25              | 1      |
| Imipenem <sup>a</sup>      |                                                              |              |              | 1<br>(3.1)   | 0<br>(3.1)   | 4<br>(15.6)  | 8<br>(40.6)  | 14<br>(84.4) | 5<br>(100.0) |              |              |                   | 2                 | 4      |
| Ertapenem                  | 12<br>(37.5)                                                 | 9<br>(65.6)  | 7<br>(87.5)  | 2<br>(93.8)  | 1<br>(96.9)  | 0<br>(96.9)  | 0<br>(96.9)  | 0<br>(96.9)  | 1<br>(100.0) |              |              |                   | 0.03              | 0.12   |
| Carbapenemase (2)          |                                                              |              |              |              |              |              |              |              |              |              |              |                   |                   |        |
| Tebipenem                  |                                                              |              |              |              |              |              |              | 1<br>(50.0)  | 0<br>(50.0)  | 1<br>(100.0) |              |                   | -                 | -      |
| Meropenem                  |                                                              |              |              |              |              |              |              | 1<br>(50.0)  | 0<br>(50.0)  | 1<br>(100.0) |              |                   | -                 | -      |
| Doripenem <sup>a</sup>     |                                                              |              |              |              |              |              | 1<br>(50.0)  | 0<br>(50.0)  | 0<br>(50.0)  | 0<br>(50.0)  | 1<br>(100.0) |                   | -                 | -      |
| Imipenem <sup>a</sup>      |                                                              |              |              |              |              |              |              |              |              | 0<br>(0.0)   | 2<br>(100.0) |                   | -                 | -      |
| Ertapenem                  |                                                              |              |              |              |              |              |              | 2<br>(100.0) |              |              |              |                   | -                 | -      |

Shading represents susceptible MIC values per CLSI 2018

Abbreviations: pAmpC, plasmid AmpC; ESBL, extended-spectrum β-lactamase.

<sup>a</sup> The lowest concentration tested for doripenem and imipenem was 0.06 mg/L.

**Supplemental Table 4** Genotype/phenotype of study isolates

| Organism<br>Genotype/phenotype | Random uropathogen set |                  | Challenge set   |
|--------------------------------|------------------------|------------------|-----------------|
|                                | No. of isolates        | % within species | No. of isolates |
| <i>E. coli</i>                 | 101                    | -                | 46              |
| Wild-type                      | 90                     | 89.1             | -               |
| pAmpC and/or ESBL              | 11                     | 10.9             | 36              |
| Carbapenemase                  | 0                      | 0.0              | 10              |
| <i>K. pneumoniae</i>           | 208                    | -                | 38              |
| Wild-type                      | 169                    | 81.3             | -               |
| pAmpC and/or ESBL              | 31                     | 14.9             | 8               |
| Carbapenemase                  | 8                      | 3.8              | 30              |
| <i>P. mirabilis</i>            | 103                    | -                | 33              |
| Wild-type                      | 102                    | 99.0             | -               |
| pAmpC and/or ESBL              | 1                      | 1.0              | 31              |
| Carbapenemase                  | 0                      | 0.0              | 2               |

Abbreviations: pAmpC, plasmid AmpC; ESBL, extended-spectrum  $\beta$ -lactamase.

**Supplemental Table 5** Carbapenem MIC results and genotype of study isolates

| Number | Category  | Organism       | MIC (mg/L) <sup>a</sup> |       |        |      |        | Genotype <sup>b</sup> |
|--------|-----------|----------------|-------------------------|-------|--------|------|--------|-----------------------|
|        |           |                | TBP                     | DOR   | ERT    | IMI  | MER    |                       |
| 840011 | Challenge | <i>E. coli</i> | ≤0.015                  | 0.12  | 0.03   | 0.12 | ≤0.015 | CP_CTX-M_Group1       |
| 840540 | Challenge | <i>E. coli</i> | ≤0.015                  | 0.12  | ≤0.015 | 0.12 | ≤0.015 | CP_CTX-M_Group1       |
| 861989 | Challenge | <i>E. coli</i> | ≤0.015                  | 0.12  | ≤0.015 | 0.12 | ≤0.015 | CP_CTX-M_Group9       |
| 765116 | Challenge | <i>E. coli</i> | 0.03                    | ≤0.06 | 0.06   | 0.12 | 0.03   | CP_CMYII              |
| 780060 | Challenge | <i>E. coli</i> | 0.03                    | ≤0.06 | 0.03   | 0.25 | 0.03   | CP_CMYII              |
| 836753 | Challenge | <i>E. coli</i> | 0.03                    | 0.12  | 0.12   | 0.12 | 0.03   | CP_CMYII              |
| 846824 | Challenge | <i>E. coli</i> | 0.03                    | 0.12  | 0.12   | 0.25 | 0.03   | CP_CMYII              |
| 738439 | Challenge | <i>E. coli</i> | 0.03                    | ≤0.06 | 0.03   | 0.12 | 0.03   | CP_CTX-M_Group1       |
| 742996 | Challenge | <i>E. coli</i> | 0.03                    | ≤0.06 | 0.03   | 0.12 | 0.03   | CP_CTX-M_Group1       |
| 750347 | Challenge | <i>E. coli</i> | 0.03                    | ≤0.06 | 0.5    | 0.12 | 0.03   | CP_CTX-M_Group1       |
| 753146 | Challenge | <i>E. coli</i> | 0.03                    | ≤0.06 | 0.25   | 0.12 | 0.03   | CP_CTX-M_Group1       |
| 761046 | Challenge | <i>E. coli</i> | 0.03                    | ≤0.06 | 0.03   | 0.12 | 0.03   | CP_CTX-M_Group1       |
| 813359 | Challenge | <i>E. coli</i> | 0.03                    | 0.12  | 0.03   | 0.12 | 0.03   | CP_CTX-M_Group1       |
| 835674 | Challenge | <i>E. coli</i> | 0.03                    | 0.12  | 0.03   | 0.12 | 0.03   | CP_CTX-M_Group1       |
| 837614 | Challenge | <i>E. coli</i> | 0.03                    | 0.12  | 0.12   | 0.12 | 0.03   | CP_CTX-M_Group1       |
| 838943 | Challenge | <i>E. coli</i> | 0.03                    | 0.12  | ≤0.015 | 0.12 | 0.03   | CP_CTX-M_Group1       |
| 840329 | Challenge | <i>E. coli</i> | 0.03                    | 0.12  | 0.03   | 0.12 | 0.03   | CP_CTX-M_Group1       |
| 846549 | Challenge | <i>E. coli</i> | 0.03                    | 0.12  | 0.03   | 0.12 | 0.03   | CP_CTX-M_Group1       |
| 848585 | Challenge | <i>E. coli</i> | 0.03                    | 0.12  | 0.03   | 0.12 | 0.03   | CP_CTX-M_Group1       |
| 850243 | Challenge | <i>E. coli</i> | 0.03                    | 0.12  | 0.03   | 0.12 | 0.03   | CP_CTX-M_Group1       |
| 859760 | Challenge | <i>E. coli</i> | 0.03                    | 0.12  | 0.06   | 0.12 | 0.03   | CP_CTX-M_Group1       |
| 865551 | Challenge | <i>E. coli</i> | 0.03                    | 0.12  | 0.03   | 0.12 | 0.03   | CP_CTX-M_Group1       |
| 744071 | Challenge | <i>E. coli</i> | 0.03                    | ≤0.06 | ≤0.015 | 0.12 | 0.03   | CP_CTX-M_Group9       |
| 780073 | Challenge | <i>E. coli</i> | 0.03                    | ≤0.06 | 0.03   | 0.12 | 0.03   | CP_CTX-M_Group9       |
| 824511 | Challenge | <i>E. coli</i> | 0.03                    | 0.12  | 0.03   | 0.12 | 0.03   | CP_CTX-M_Group9       |
| 828779 | Challenge | <i>E. coli</i> | 0.03                    | 0.12  | 0.03   | 0.12 | 0.03   | CP_CTX-M_Group9       |
| 846531 | Challenge | <i>E. coli</i> | 0.03                    | 0.12  | ≤0.015 | 0.12 | 0.03   | CP_CTX-M_Group9       |
| 924068 | Challenge | <i>E. coli</i> | 0.03                    | ≤0.06 | ≤0.015 | 0.12 | 0.03   | CP_CTX-M_Group9       |
| 751432 | Challenge | <i>E. coli</i> | 0.03                    | ≤0.06 | ≤0.015 | 0.12 | 0.03   | CP_SHV_ESBL           |
| 845741 | Challenge | <i>E. coli</i> | 0.03                    | 0.12  | 0.06   | 0.12 | 0.03   | CTX-M-15, OXA-1       |
| 844466 | Challenge | <i>E. coli</i> | 0.06                    | 0.12  | 0.5    | 0.25 | 0.06   | CMY-133               |
| 872217 | Challenge | <i>E. coli</i> | 0.06                    | 0.12  | 1      | 0.5  | 0.06   | CMY-2                 |

|        |           |                      |      |       |        |      |      |                                     |
|--------|-----------|----------------------|------|-------|--------|------|------|-------------------------------------|
| 750904 | Challenge | <i>E. coli</i>       | 0.06 | ≤0.06 | 0.5    | 0.12 | 0.06 | CP_CTX-M_Group1                     |
| 742654 | Challenge | <i>E. coli</i>       | 0.06 | ≤0.06 | 0.06   | 0.5  | 0.06 | SHV-12                              |
| 850505 | Challenge | <i>E. coli</i>       | 0.12 | 0.25  | 0.12   | 0.5  | 0.12 | CMY-2, OXA-1                        |
| 764048 | Challenge | <i>E. coli</i>       | 1    | 1     | 4      | 4    | 1    | KPC-3                               |
| 636486 | Challenge | <i>E. coli</i>       | 4    | 1     | 8      | 2    | 4    | KPC-2                               |
| 785701 | Challenge | <i>E. coli</i>       | 4    | 2     | 8      | 4    | 4    | KPC-2                               |
| 749610 | Challenge | <i>E. coli</i>       | 4    | 2     | 4      | 4    | 4    | KPC-3                               |
| 805039 | Challenge | <i>E. coli</i>       | 8    | 4     | >8     | 4    | 8    | KPC-2                               |
| 805027 | Challenge | <i>E. coli</i>       | 8    | 2     | >8     | 4    | 8    | KPC-2, OXA-9                        |
| 637562 | Challenge | <i>E. coli</i>       | 8    | 4     | >8     | 1    | 8    | KPC-3                               |
| 712375 | Challenge | <i>E. coli</i>       | >8   | 8     | >8     | 8    | >8   | KPC-2                               |
| 813671 | Challenge | <i>E. coli</i>       | >8   | >8    | >8     | >8   | >8   | NDM-5                               |
| 814512 | Challenge | <i>E. coli</i>       | >8   | >8    | >8     | >8   | >8   | NDM-7                               |
| 713837 | Challenge | <i>K. pneumoniae</i> | 0.03 | ≤0.06 | 0.03   | 0.12 | 0.03 | CP_CTX-M_Group9                     |
| 744595 | Challenge | <i>K. pneumoniae</i> | 0.03 | ≤0.06 | ≤0.015 | 0.12 | 0.03 | CP_FOX                              |
| 761985 | Challenge | <i>K. pneumoniae</i> | 0.03 | ≤0.06 | 0.03   | 0.12 | 0.03 | CP_SHV_ESBL                         |
| 761147 | Challenge | <i>K. pneumoniae</i> | 0.03 | ≤0.06 | 0.12   | 0.12 | 0.03 | CTX-M-55/57                         |
| 776273 | Challenge | <i>K. pneumoniae</i> | 0.03 | ≤0.06 | 0.12   | 0.12 | 0.03 | SHV-1, SHV-12                       |
| 753218 | Challenge | <i>K. pneumoniae</i> | 0.06 | ≤0.06 | 0.06   | 0.25 | 0.06 | CP_CMYII                            |
| 707714 | Challenge | <i>K. pneumoniae</i> | 0.06 | ≤0.06 | 0.12   | 0.12 | 0.06 | CTX-M-15                            |
| 642277 | Challenge | <i>K. pneumoniae</i> | 0.06 | 0.12  | 0.25   | 0.25 | 0.06 | DHA-1, OXA-1, SHV-61, TEM-1         |
| 673456 | Challenge | <i>K. pneumoniae</i> | 2    | >8    | 8      | 8    | 2    | CTX-M-15-like, CTX-M-3-like, OXA-48 |
| 774940 | Challenge | <i>K. pneumoniae</i> | 4    | 2     | 8      | 4    | 4    | KPC-2                               |
| 747216 | Challenge | <i>K. pneumoniae</i> | 4    | 1     | 8      | 2    | 4    | KPC-3                               |
| 765668 | Challenge | <i>K. pneumoniae</i> | 4    | 4     | >8     | 2    | 4    | OXA-48                              |
| 681322 | Challenge | <i>K. pneumoniae</i> | 4    | >8    | 2      | 8    | 4    | VIM-1                               |
| 416095 | Challenge | <i>K. pneumoniae</i> | 4    | 4     | 4      | 4    | 4    | VIM-like                            |
| 748004 | Challenge | <i>K. pneumoniae</i> | 8    | 4     | >8     | 4    | 8    | KPC-2                               |
| 760595 | Challenge | <i>K. pneumoniae</i> | 8    | 4     | >8     | 4    | 8    | KPC-2                               |
| 803291 | Challenge | <i>K. pneumoniae</i> | 8    | 2     | 8      | 4    | 8    | KPC-2                               |
| 602754 | Challenge | <i>K. pneumoniae</i> | >8   | 8     | >8     | >8   | >8   | CMY-6, NDM-1, OXA-1                 |
| 779303 | Challenge | <i>K. pneumoniae</i> | >8   | >8    | >8     | >8   | >8   | CP_CMYII, CP_CTX-M_Group1, KPC-2    |
| 405507 | Challenge | <i>K. pneumoniae</i> | >8   | >8    | >8     | >8   | >8   | CTX-M-15, OXA-181, OXA-1            |
| 407150 | Challenge | <i>K. pneumoniae</i> | >8   | >8    | >8     | >8   | >8   | CTX-M-15, OXA-181, OXA-1            |
| 694901 | Challenge | <i>K. pneumoniae</i> | >8   | >8    | 8      | 4    | >8   | IMP-1                               |
| 761989 | Challenge | <i>K. pneumoniae</i> | >8   | 4     | >8     | 8    | >8   | KPC-2                               |

|        |           |                      |      |       |        |      |      |                                       |
|--------|-----------|----------------------|------|-------|--------|------|------|---------------------------------------|
| 762632 | Challenge | <i>K. pneumoniae</i> | >8   | >8    | >8     | >8   | >8   | KPC-2                                 |
| 767089 | Challenge | <i>K. pneumoniae</i> | >8   | 4     | >8     | 8    | >8   | KPC-2                                 |
| 783079 | Challenge | <i>K. pneumoniae</i> | >8   | 8     | >8     | 8    | >8   | KPC-2                                 |
| 744519 | Challenge | <i>K. pneumoniae</i> | >8   | 8     | >8     | 8    | >8   | KPC-3                                 |
| 745411 | Challenge | <i>K. pneumoniae</i> | >8   | 8     | >8     | 8    | >8   | KPC-3                                 |
| 802901 | Challenge | <i>K. pneumoniae</i> | >8   | 8     | >8     | 8    | >8   | KPC-3                                 |
| 807702 | Challenge | <i>K. pneumoniae</i> | >8   | 8     | >8     | 8    | >8   | KPC-3, VIM-1                          |
| 811951 | Challenge | <i>K. pneumoniae</i> | >8   | >8    | >8     | >8   | >8   | NDM-1, OXA-10, OXA-244, SHV-11, VIM-1 |
| 813641 | Challenge | <i>K. pneumoniae</i> | >8   | >8    | >8     | >8   | >8   | NDM-1, OXA-232                        |
| 782429 | Challenge | <i>K. pneumoniae</i> | >8   | >8    | >8     | >8   | >8   | NDM-7                                 |
| 674232 | Challenge | <i>K. pneumoniae</i> | >8   | 4     | >8     | 4    | >8   | OXA-48                                |
| 759711 | Challenge | <i>K. pneumoniae</i> | >8   | 8     | >8     | 4    | >8   | OXA-48                                |
| 763287 | Challenge | <i>K. pneumoniae</i> | >8   | >8    | >8     | 4    | >8   | OXA-48                                |
| 699665 | Challenge | <i>K. pneumoniae</i> | >8   | >8    | >8     | >8   | >8   | VIM-26                                |
| 418007 | Challenge | <i>K. pneumoniae</i> | >8   | 4     | 8      | 8    | >8   | VIM-like                              |
| 824918 | Challenge | <i>P. mirabilis</i>  | 0.03 | 0.12  | ≤0.015 | 2    | 0.03 | CP_CTX-M_Group9                       |
| 898022 | Challenge | <i>P. mirabilis</i>  | 0.06 | ≤0.06 | ≤0.015 | 0.5  | 0.06 | CP_CMYII                              |
| 909077 | Challenge | <i>P. mirabilis</i>  | 0.06 | 0.25  | 0.03   | 4    | 0.06 | CP_CMYII                              |
| 929419 | Challenge | <i>P. mirabilis</i>  | 0.06 | 0.12  | ≤0.015 | 1    | 0.06 | CP_CMYII                              |
| 913743 | Challenge | <i>P. mirabilis</i>  | 0.06 | 0.25  | ≤0.015 | 2    | 0.06 | CP_CTX-M_Group1                       |
| 932239 | Challenge | <i>P. mirabilis</i>  | 0.06 | ≤0.06 | ≤0.015 | 0.12 | 0.06 | CP_CTX-M_Group1                       |
| 875413 | Challenge | <i>P. mirabilis</i>  | 0.06 | 0.25  | ≤0.015 | 1    | 0.06 | CP_SHV_ESBL                           |
| 883965 | Challenge | <i>P. mirabilis</i>  | 0.06 | 0.5   | ≤0.015 | 2    | 0.06 | CP_TEM_ESBL                           |
| 924975 | Challenge | <i>P. mirabilis</i>  | 0.06 | ≤0.06 | ≤0.015 | 1    | 0.06 | CP_TEM_ESBL                           |
| 872295 | Challenge | <i>P. mirabilis</i>  | 0.06 | 0.25  | 0.03   | 2    | 0.06 | CTX-M-2-like, OXA-2-like              |
| 877960 | Challenge | <i>P. mirabilis</i>  | 0.12 | ≤0.06 | 0.03   | 0.5  | 0.12 | CP_CMYII                              |
| 895338 | Challenge | <i>P. mirabilis</i>  | 0.12 | 0.25  | ≤0.015 | 2    | 0.12 | CP_CMYII                              |
| 898771 | Challenge | <i>P. mirabilis</i>  | 0.12 | 0.25  | ≤0.015 | 2    | 0.12 | CP_CMYII                              |
| 916763 | Challenge | <i>P. mirabilis</i>  | 0.12 | 0.25  | 0.06   | 2    | 0.12 | CP_CMYII                              |
| 879714 | Challenge | <i>P. mirabilis</i>  | 0.12 | ≤0.06 | 0.03   | 0.5  | 0.12 | CP_CTX-M_Group1                       |
| 889129 | Challenge | <i>P. mirabilis</i>  | 0.12 | 0.5   | ≤0.015 | 4    | 0.12 | CP_CTX-M_Group1                       |
| 824917 | Challenge | <i>P. mirabilis</i>  | 0.12 | 0.12  | 0.03   | 2    | 0.12 | CP_CTX-M_Group9                       |
| 922683 | Challenge | <i>P. mirabilis</i>  | 0.12 | 0.12  | 0.03   | 0.5  | 0.12 | CP_SHV_ESBL                           |
| 829140 | Challenge | <i>P. mirabilis</i>  | 0.25 | 0.12  | 0.06   | 2    | 0.25 | CP_CMYII                              |
| 900230 | Challenge | <i>P. mirabilis</i>  | 0.25 | 1     | 0.12   | 2    | 0.25 | CP_CMYII                              |
| 892631 | Challenge | <i>P. mirabilis</i>  | 0.25 | 0.5   | 0.06   | 2    | 0.25 | CP_CMYII, CP_FOX                      |

|        |             |                      |        |       |        |      |        |                         |
|--------|-------------|----------------------|--------|-------|--------|------|--------|-------------------------|
| 918129 | Challenge   | <i>P. mirabilis</i>  | 0.25   | 1     | 0.03   | 1    | 0.25   | CP_CTX-M_Group1         |
| 891173 | Challenge   | <i>P. mirabilis</i>  | 0.25   | 0.5   | 0.03   | 1    | 0.25   | CP_CTX-M_Group9         |
| 555493 | Challenge   | <i>P. mirabilis</i>  | 0.25   | 0.12  | 0.03   | 1    | 0.25   | FOX-5                   |
| 890924 | Challenge   | <i>P. mirabilis</i>  | 0.5    | 0.12  | 0.06   | 2    | 0.5    | CP_CMYII                |
| 929732 | Challenge   | <i>P. mirabilis</i>  | 0.5    | 0.5   | 0.25   | 1    | 0.5    | CP_CMYII                |
| 876039 | Challenge   | <i>P. mirabilis</i>  | 0.5    | 1     | 0.06   | 2    | 0.5    | CP_CTX-M_Group1         |
| 882604 | Challenge   | <i>P. mirabilis</i>  | 0.5    | 1     | 0.06   | 4    | 0.5    | CP_TEM_ESBL             |
| 899923 | Challenge   | <i>P. mirabilis</i>  | 0.5    | 1     | 0.06   | 4    | 0.5    | CP_TEM_ESBL             |
| 880588 | Challenge   | <i>P. mirabilis</i>  | 0.5    | 0.5   | 0.12   | 2    | 0.5    | CTX-M-8-like            |
| 877308 | Challenge   | <i>P. mirabilis</i>  | 2      | 1     | 2      | >8   | 2      | CP_KPC                  |
| 892550 | Challenge   | <i>P. mirabilis</i>  | 4      | 2     | 4      | 4    | 4      | CTX-M-2-like            |
| 299431 | Challenge   | <i>P. mirabilis</i>  | 8      | >8    | 2      | >8   | 8      | VIM-1                   |
| 983883 | Uropathogen | <i>E. coli</i>       | ≤0.015 | ≤0.06 | ≤0.015 | 0.12 | 0.03   | CTX-M-14                |
| 942430 | Uropathogen | <i>E. coli</i>       | ≤0.015 | ≤0.06 | 0.03   | 0.12 | ≤0.015 | CTX-M-14, OXA-1         |
| 934570 | Uropathogen | <i>E. coli</i>       | ≤0.015 | ≤0.06 | 0.03   | 0.12 | ≤0.015 | CTX-M-27                |
| 939034 | Uropathogen | <i>E. coli</i>       | ≤0.015 | ≤0.06 | ≤0.015 | 0.06 | ≤0.015 | CTX-M-55                |
| 971948 | Uropathogen | <i>E. coli</i>       | ≤0.015 | ≤0.06 | ≤0.015 | 0.12 | ≤0.015 | SHV-12                  |
| 968732 | Uropathogen | <i>E. coli</i>       | 0.03   | ≤0.06 | 0.03   | 0.12 | ≤0.015 | CTX-M-15, OXA-1         |
| 955472 | Uropathogen | <i>E. coli</i>       | 0.06   | ≤0.06 | 0.12   | 0.5  | 0.03   | CMY-2                   |
| 956695 | Uropathogen | <i>E. coli</i>       | 0.06   | ≤0.06 | 0.25   | 0.5  | 0.03   | CMY-2                   |
| 953360 | Uropathogen | <i>E. coli</i>       | 0.06   | ≤0.06 | 0.5    | 0.06 | 0.12   | CTX-M-15                |
| 964287 | Uropathogen | <i>E. coli</i>       | 0.06   | ≤0.06 | 0.5    | 0.12 | 0.06   | CTX-M-15, OXA-1         |
| 984150 | Uropathogen | <i>E. coli</i>       | 0.12   | ≤0.06 | 0.5    | 0.25 | 0.06   | CMY-2                   |
| 937209 | Uropathogen | <i>E. coli</i>       | 0.12   | 0.25  | 0.12   | 0.5  | 0.06   | CTX-M-15                |
| 968284 | Uropathogen | <i>K. pneumoniae</i> | 0.03   | 0.12  | 0.12   | 0.12 | 0.03   | PSE-1, CTX-M-15, SHV-11 |
| 935254 | Uropathogen | <i>K. pneumoniae</i> | 0.03   | ≤0.06 | ≤0.015 | 0.12 | 0.03   | CTX-M-14, SHV-11        |
| 964933 | Uropathogen | <i>K. pneumoniae</i> | 0.03   | ≤0.06 | 0.03   | 0.25 | 0.03   | CTX-M-15                |
| 964932 | Uropathogen | <i>K. pneumoniae</i> | 0.03   | ≤0.06 | 0.06   | 0.12 | 0.03   | CTX-M-15, OXA-1         |
| 950070 | Uropathogen | <i>K. pneumoniae</i> | 0.03   | ≤0.06 | ≤0.015 | 0.25 | 0.03   | CTX-M-15, OXA-1, SHV-1  |
| 935511 | Uropathogen | <i>K. pneumoniae</i> | 0.03   | ≤0.06 | 0.06   | 0.12 | 0.03   | CTX-M-15, OXA-1, SHV-11 |
| 942575 | Uropathogen | <i>K. pneumoniae</i> | 0.03   | ≤0.06 | 0.06   | 0.12 | 0.03   | CTX-M-15, OXA-1, SHV-11 |
| 968307 | Uropathogen | <i>K. pneumoniae</i> | 0.03   | ≤0.06 | 0.25   | 0.12 | 0.06   | CTX-M-15, OXA-1, SHV-11 |
| 983840 | Uropathogen | <i>K. pneumoniae</i> | 0.03   | ≤0.06 | 0.12   | 0.12 | 0.03   | CTX-M-15, OXA-1, SHV-11 |
| 988596 | Uropathogen | <i>K. pneumoniae</i> | 0.03   | ≤0.06 | 0.06   | 0.12 | 0.06   | CTX-M-15, OXA-1, SHV-27 |
| 939045 | Uropathogen | <i>K. pneumoniae</i> | 0.03   | ≤0.06 | 0.12   | 0.12 | 0.03   | CTX-M-15, OXA-1, SHV-28 |
| 972879 | Uropathogen | <i>K. pneumoniae</i> | 0.03   | 0.12  | 0.12   | 0.12 | 0.06   | CTX-M-15, OXA-1, SHV-28 |



|        |             |                          |      |       |        |      |        |                                       |
|--------|-------------|--------------------------|------|-------|--------|------|--------|---------------------------------------|
| 964902 | Uropathogen | <i>K. pneumoniae</i>     | 0.03 | ≤0.06 | 0.03   | 0.12 | ≤0.015 | CTX-M-15, OXA-1, SHV-76               |
| 977786 | Uropathogen | <i>K. pneumoniae</i>     | 0.03 | ≤0.06 | 0.06   | 0.12 | 0.06   | CTX-M-15, SHV-11                      |
| 984380 | Uropathogen | <i>K. pneumoniae</i>     | 0.03 | ≤0.06 | 0.03   | 0.12 | ≤0.015 | CTX-M-15, SHV-11                      |
| 937177 | Uropathogen | <i>K. pneumoniae</i>     | 0.03 | ≤0.06 | 0.25   | 0.12 | 0.03   | CTX-M-15, SHV-28                      |
| 942812 | Uropathogen | <i>K. pneumoniae</i>     | 0.03 | ≤0.06 | 0.25   | 0.12 | 0.03   | CTX-M-15, SHV-28                      |
| 959949 | Uropathogen | <i>K. pneumoniae</i>     | 0.03 | ≤0.06 | 0.03   | 0.12 | 0.03   | CTX-M-15, SHV-28                      |
| 978304 | Uropathogen | <i>K. pneumoniae</i>     | 0.03 | ≤0.06 | ≤0.015 | 0.12 | 0.03   | SHV-27                                |
| 950110 | Uropathogen | <i>K. pneumoniae</i>     | 0.06 | ≤0.06 | 0.25   | 0.12 | 0.03   | CTX-M-15, OXA-1, SHV-1                |
| 961709 | Uropathogen | <i>K. pneumoniae</i>     | 0.06 | ≤0.06 | 0.06   | 0.25 | 0.03   | CTX-M-15, OXA-1, SHV-1                |
| 970702 | Uropathogen | <i>K. pneumoniae</i>     | 0.06 | ≤0.06 | 0.06   | 0.25 | 0.03   | CTX-M-15, OXA-1, SHV-11               |
| 953367 | Uropathogen | <i>K. pneumoniae</i>     | 0.12 | 0.25  | 1      | 0.5  | 0.12   | CTX-M-15, DHA-1, OXA-1, OXA-9         |
| 965646 | Uropathogen | <i>K. pneumoniae</i>     | 0.12 | 0.12  | 2      | 1    | 0.06   | CTX-M-15, DHA-1, OXA-1, OXA-9, SHV-11 |
| 960673 | Uropathogen | <i>K. pneumoniae</i>     | 0.12 | ≤0.06 | 0.12   | 0.06 | 0.03   | CTX-M-15, OXA-1                       |
| 953371 | Uropathogen | <i>K. pneumoniae</i>     | 0.25 | 0.12  | 1      | 1    | 0.06   | CTX-M-15, DHA-1, OXA-1, OXA-9, SHV-11 |
| 965661 | Uropathogen | <i>K. pneumoniae</i>     | 0.25 | 0.25  | 4      | 1    | 0.25   | CTX-M-15, DHA-1, OXA-1, OXA-9, SHV-11 |
| 934954 | Uropathogen | <i>K. pneumoniae</i>     | 0.25 | 0.25  | 1      | 0.12 | 0.25   | CTX-M-15, OXA-1, SHV-28               |
| 960660 | Uropathogen | <i>K. pneumoniae</i>     | 1    | 8     | 8      | 4    | 2      | OXA-48, CTX-M-15, OXA-1, SHV-76       |
| 965666 | Uropathogen | <i>K. pneumoniae</i>     | 2    | 2     | >8     | 1    | 2      | CTX-M-15, OXA-1, SHV-11               |
| 953369 | Uropathogen | <i>K. pneumoniae</i>     | 4    | 4     | >8     | 1    | 4      | CTX-M-15, OXA-1, SHV-11               |
| 965657 | Uropathogen | <i>K. pneumoniae</i>     | 8    | 8     | >8     | 8    | 4      | CTX-M-15, DHA-1, OXA-1, SHV-11        |
| 942447 | Uropathogen | <i>K. pneumoniae</i>     | >8   | >8    | >8     | >8   | >8     | KPC-2                                 |
| 942544 | Uropathogen | <i>K. pneumoniae</i>     | >8   | 8     | >8     | 8    | >8     | KPC-2, CTX-M-15, OXA-1, SHV-28        |
| 961751 | Uropathogen | <i>K. pneumoniae</i>     | >8   | 2     | >8     | 8    | 2      | KPC-2, CTX-M-15, OXA-1, SHV-76        |
| 985275 | Uropathogen | <i>K. pneumoniae</i>     | >8   | >8    | >8     | >8   | >8     | KPC-2, SHV-12                         |
| 985277 | Uropathogen | <i>K. pneumoniae</i>     | >8   | >8    | >8     | >8   | >8     | KPC-2, SHV-12                         |
| 942556 | Uropathogen | <i>K. pneumoniae</i>     | >8   | >8    | >8     | >8   | >8     | KPC-3                                 |
| 942555 | Uropathogen | <i>K. pneumoniae</i>     | >8   | >8    | >8     | >8   | >8     | KPC-3, OXA-9                          |
| 960663 | Uropathogen | <i>Proteus mirabilis</i> | 0.12 | 0.5   | ≤0.015 | 1    | 0.06   | CTX-M-2, TEM-1                        |

<sup>a</sup> TBP, tebipenem; DOR, doripenem; ERT, ertapenem; IMI, imipenem; MER, meropenem.

<sup>b</sup> The challenge set of isolates were characterized using a microarray based assay Check-MDR CT101 kit (Check-points, Wageningen, Netherlands). The assay was performed according to the manufacturer's instructions. This kit has the capability to detect CTX-M Groups 1, 2, 8+25 and 9, TEM wild-type (WT) and ESBL, SHV WT and ESBL, ACC, ACT/MIR, CMYII, DHA, FOX, KPC and NDM-1. The most common mutations that expand the spectrum of TEM and SHV enzymes are detected by this assay and these mutations include 104K, 164S/C/H or 123S for TEM and 138S, 238A and 240K for SHV. The uropathogen set were recovered during 2016 and characterized using genome sequencing and *in silico* analysis.
